# Supplementary material for: Age, growth and population structure of invasive lionfish (Pterois volitans/miles) in northeast Florida using a length-based, age-structured population model
Source: PeerJ. 2016 Dec 1;4:e2730. doi: 10.7717/peerj.2730 (PMC5136135; doi:10.7717/peerj.2730)
Supplement: Supplemental Information 1 [file peerj-04-2730-s001.xlsx]

## Sheet: Sheet1
Lionfish TL data used in length-based modeling and validation for Johnson and Swenarton (In review). See methdos for details.
Total length (TL)	April 2013	August 2013	April 2014	July 2014	August 2014	October 2014	November 2014	January 2015	August 2015
0	0	0	0	0	0	0	0	0	0
10	0	0	0	0	0	0	0	0	0
20	0	0	0	0	0	0	0	0	0
30	0	0	0	0	0	0	0	0	0
40	0	0	0	0	1	0	0	0	0
50	0	0	1	0	0	0	0	0	1
60	0	0	0	0	0	0	0	0	0
70	0	0	0	0	0	0	0	0	0
80	0	0	0	0	0	1	0	0	0
90	2	1	0	0	3	0	0	0	0
100	1	1	1	0	6	0	0	0	1
110	5	2	0	0	7	0	0	0	0
120	8	1	1	0	3	2	1	0	1
130	16	0	5	0	4	4	1	0	5
140	24	1	9	0	2	1	0	0	9
150	37	5	36	3	3	1	0	0	36
160	26	9	100	2	15	5	1	0	100
170	10	18	189	0	23	0	1	0	189
180	16	26	232	2	61	0	1	0	232
190	6	48	262	2	61	0	0	1	262
200	6	50	267	5	65	6	1	1	267
210	1	69	220	4	84	4	1	1	220
220	5	84	145	0	70	6	1	0	145
230	0	46	116	1	66	6	0	3	116
240	4	14	106	3	42	4	1	6	106
250	2	6	84	0	34	4	4	11	84
260	9	1	80	1	25	2	4	18	80
270	11	8	92	0	48	0	1	8	92
280	20	2	87	2	46	1	5	7	87
290	16	2	88	4	59	0	5	2	88
300	22	5	102	1	83	0	5	0	102
310	8	10	78	1	70	2	1	0	78
320	3	6	60	1	64	1	1	0	60
330	3	5	35	0	52	2	2	0	35
340	2	6	43	1	32	1	2	0	43
350	1	4	27	0	19	0	1	0	27
360	0	0	34	0	12	0	1	0	34
370	0	2	33	0	6	0	0	0	33
380	0	1	20	0	6	0	0	0	20
390	0	1	12	0	6	0	0	0	12
400	0	0	10	0	8	0	0	0	10
410	0	0	4	0	7	0	0	0	4
420	0	1	3	0	6	0	0	0	3
430	0	0	0	0	1	0	0	0	0
440	0	0	0	0	1	0	0	0	0
450	0	0	1	0	1	0	0	0	1
